# Supplementary material
Source: publisher figshare collection journal article supplement (https://acs.figshare.com/ndownloader/files/4776511)
Supplement: Supplementary file 1 [file 4776511]

**DETERMINATION OF THERMAL DIFFUSIVITIES, THERMAL  
CONDUCTIVITIES, AND SOUND SPEEDS OF  
ROOM TEMPERATURE IONIC LIQUIDS BY  
THE TRANSIENT GRATING TECHNIQUE**

Clifford Frez<sup>\*</sup> and Gerald J. Diebold

Department of Chemistry, Brown University,  
324 Brook Street, Providence, Rhode Island 02906

and

Chieu D. Tran and Shaofang Yu

Department of Chemistry, Marquette University  
P. O. Box 1881, Milwaukee, Wisconsin 53201

**Supporting Information**

---

<sup>\*</sup> To whom correspondence may be addressed. Tel: 401-863-3619. Email: frez@brown.edu.

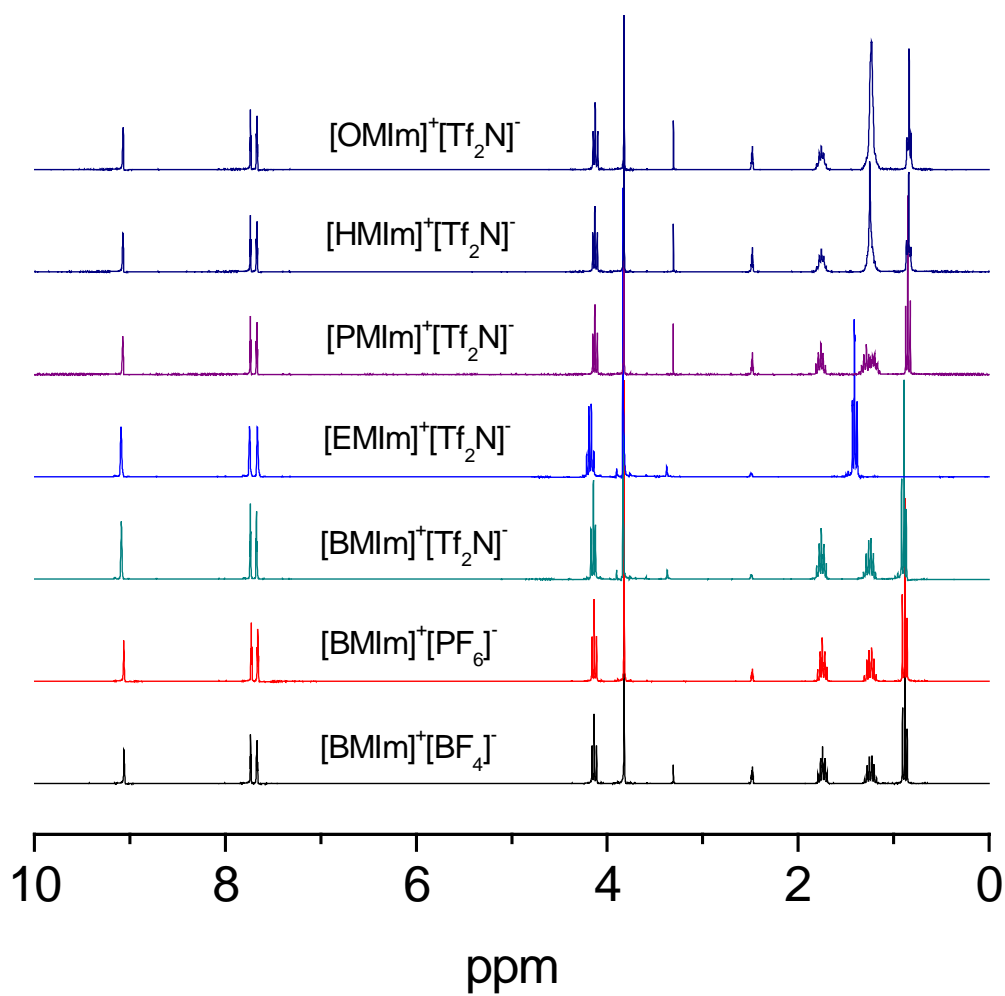

Figure S1.  $^1\text{H}$  NMR spectra of seven ionic liquids ([BMIm] $^+[\text{BF}_4]^-$ , [BMIm] $^+[\text{PF}_6]^-$ , [BMIm] $^+[\text{Tf}_2\text{N}]^-$ , [EMIm] $^+[\text{Tf}_2\text{N}]^-$ , [PMIm] $^+[\text{Tf}_2\text{N}]^-$ , [HMIm] $^+[\text{Tf}_2\text{N}]^-$ , and [OMIm] $^+[\text{Tf}_2\text{N}]^-$  used in this work (in DMSO- $d_6$ ).
